# Supplementary material for: Novel aldo-keto reductase 1C3 inhibitor affects androgen metabolism but not ovarian function in healthy women: a phase 1 study
Source: PubMed Central journal article supplement — Eur J Endocrinol. 2023 Jun 12;189(1):15–28. doi: 10.1093/ejendo/lvad063 (PMC10376460; doi:10.1093/ejendo/lvad063), 2023-06-12
Supplement: lvad063_supplementary_data.pdf [file lvad063_supplementary_data.pdf]

## **Novel AKR1C3 inhibitor affects androgen metabolism but not ovarian function in healthy women: A phase 1 study.**

Isabella Gashaw <sup>a,f</sup>, Stefanie Reif <sup>a</sup>, Herbert Wiesinger <sup>a</sup>, Andreas Kaiser <sup>a</sup>, Frank S. Zollmann <sup>b</sup>, Christian Scheerans <sup>a</sup>, Joachim Grevel <sup>c</sup>, Paolo Piraino <sup>a</sup>, Henrik Seidel <sup>a</sup>, Antje Rottmann <sup>a</sup>, Beate Rohde <sup>a</sup>, Wiebke Arlt <sup>d,e</sup>, Jan Hilpert <sup>a</sup>

<sup>a</sup> Bayer AG, Research & Development – Pharmaceuticals, Berlin, Germany

<sup>b</sup> pharma consult, Berlin, Germany

<sup>c</sup> Bast GmbH, Heidelberg, Germany

<sup>d</sup> Medical Research Council London Institute of Medical Sciences, London, UK

<sup>e</sup> Department of Clinical Sciences, Faculty of Medicine, Imperial College London, UK

<sup>f</sup> current affiliation: Boehringer Ingelheim Pharma GmbH & Co. KG

Corresponding author:

Dr Jan Hilpert  
Bayer AG  
Research & Development, Pharmaceuticals  
Translational Clinical Medicine  
13342 Berlin, Germany  
Phone: +49 30 468-192396  
Mobile: +49 175 3092191  
E-mail: [jan.hilpert@bayer.com](mailto:jan.hilpert@bayer.com)

**Supplemental Material**

## Contents

|          |                                                                          |           |
|----------|--------------------------------------------------------------------------|-----------|
| <b>1</b> | <b>Methods</b>                                                           | <b>3</b>  |
| 1.1      | In-vitro assay for IC50 for inhibition of human AKR1C3 enzyme            | 3         |
| 1.2      | Pharmacokinetic evaluation                                               | 3         |
| 1.2.1    | Bioanalytical methods                                                    | 3         |
| 1.2.2    | Pharmacokinetic methods                                                  | 3         |
| 1.2.3    | Population pharmacokinetic and pharmacokinetic/-dynamic modeling methods | 3         |
| 1.3      | Evaluation of exploratory biomarkers for renal safety                    | 4         |
| <b>2</b> | <b>Results</b>                                                           | <b>5</b>  |
| 2.1      | Supplemental tables                                                      | 5         |
| 2.2      | Supplemental figures                                                     | 17        |
| 2.3      | Population pharmacokinetic modeling                                      | 20        |
| 2.4      | Evaluation of renal safety                                               | 21        |
| <b>3</b> | <b>References</b>                                                        | <b>21</b> |

### List of Figures

|                  |                                                                                                                                               |    |
|------------------|-----------------------------------------------------------------------------------------------------------------------------------------------|----|
| Suppl. Figure 1: | Subject disposition                                                                                                                           | 17 |
| Suppl. Figure 2: | Individual estradiol and progesterone serum concentrations before and during treatment with BAY1128688 60 mg QD and BID (premenopausal women) | 18 |
| Suppl. Figure 3: | Ovarian activity (Hoogland scores) before and during treatment with BAY1128688 60 mg QD and BID (premenopausal women)                         | 19 |

### List of Tables

|                 |                                                                                                                                                                                                                                               |    |
|-----------------|-----------------------------------------------------------------------------------------------------------------------------------------------------------------------------------------------------------------------------------------------|----|
| Suppl. Table 1: | Performance of the LC-MS/MS method for the quantification of BAY1128688 and BAY1107202 in plasma                                                                                                                                              | 5  |
| Suppl. Table 2: | Serum concentrations [nmol/L] of 17 steroids in <i>postmenopausal</i> women before, during, and after 14-day administration of BAY1128688                                                                                                     | 6  |
| Suppl. Table 3: | PK parameters of BAY1128688 and its metabolite M-7 in plasma (geometric mean/%CV) obtained after single and multiple oral administration of different doses of BAY1128688 to <i>post-</i> and <i>premenopausal</i> women                      | 10 |
| Suppl. Table 4: | Most common treatment-emergent adverse events ( <i>post-</i> and <i>premenopausal</i> women) – incidences without consideration of the drug-event relationship and incidences for events which the investigator considered study-drug related | 12 |
| Suppl. Table 5: | Treatment-emergent adverse events ( <i>post-</i> and <i>premenopausal</i> women)                                                                                                                                                              | 13 |
| Suppl. Table 6: | Androsterone, etiocholanolone, and DHT in serum: Minimum and maximum concentrations observed and reference ranges for healthy <i>premenopausal</i> women                                                                                      | 16 |

## 1 Methods

### 1.1 In-vitro assay for IC<sub>50</sub> for inhibition of human AKR1C3 enzyme

#### Biochemical enzyme assay

Human AKR1C3 (aldo-keto reductase family 1 member C3, Gene ID: 8644) was expressed in *Escherichia coli* (*E. coli*) as glutathione S transferase (GST) fusion protein and purified by glutathione sepharose affinity chromatography. The GST was removed by digestion with thrombin. Enzyme activity was measured by quantification of coumberol formation from coumberone, a metabolic fluorogenic substrate for AKR1C3 (5, 6), at a coumberone concentration of 0.3  $\mu\text{mol/L}$  ( $K_m$ ). The fluorescence of coumberol was then measured, and the intensity of the fluorescence was used as a measure of coumberol amount formed and thus of AKR1C3 enzyme activity. IC<sub>50</sub> values were calculated using a 4-parameter fit.

### 1.2 Pharmacokinetic evaluation

#### 1.2.1 Bioanalytical methods

The concentrations of BAY1128688 and its metabolite BAY1107202 (M-7) in plasma were determined after protein precipitation with acetonitrile including an internal standard and 0.1% acetic acid followed by separation employing high-pressure liquid chromatography– tandem mass spectrometry (LC-MS/MS). Method validation and analyses of study samples were performed in compliance with the relevant guidelines of the US Food and Drug Administration. Quality control samples were included in each analytical run (performance parameters in [Suppl. Table 1](#)).

#### 1.2.2 Pharmacokinetic methods

The following non-compartmental single- and multiple-dose PK parameters were determined for the parent drug BAY1128688 and its metabolite BAY1107202 (M-7) using the software WinNonlin v5.3 (Certara, Princeton, NJ):

- the area under the plasma concentration–time curve from time zero to infinity after single-dose administration (AUC);
- the area under the plasma concentration–time curve from time zero to 24 h post-dose after single-dose and multiple-dose administration (AUC(0-24), AUC(0-24)<sub>multiple-dose</sub>);
- the maximum observed concentration in plasma after single-dose and multiple-dose administration ( $C_{\text{max}}$ ,  $C_{\text{max,multiple-dose}}$ );
- the minimum observed concentration in plasma after multiple-dose administration ( $C_{\text{min,multiple-dose}}$ );
- the time to maximum concentration ( $t_{\text{max}}$ ,  $t_{\text{max,multiple-dose}}$ ); and
- the half-life associated with the terminal slope ( $t_{1/2}$ ).

Based on these parameters, dose-normalized area under the plasma concentration–time curve and  $C_{\text{max}}$  values, the metabolic ratio MR ( $\text{MR} = (\text{AUC}(0-24)_{\text{metabolite}}/\text{AUC}(0-24)_{\text{parent}}) \times (\text{molecular weight}_{\text{parent}}/\text{molecular weight}_{\text{metabolite}})$ ), the accumulation ratio  $R_{\text{AUC}}$  ( $R_{\text{AUC}} = \text{AUC}(0-24)_{\text{multiple-dose}}/\text{AUC}(0-24)$ ), and the linearity index  $R_{\text{LIN}}$  ( $R_{\text{LIN}} = \text{AUC}(0-24)_{\text{multiple-dose}}/\text{AUC}$ ) were determined.

#### 1.2.3 Population pharmacokinetic and pharmacokinetic/-dynamic modeling methods

A population pharmacokinetic (popPK) model and a population pharmacokinetic/pharmacodynamic (popPK/PD) model were developed to describe the plasma concentrations of BAY1128688 and the time-course of bilirubin in serum, respectively. The models were developed based on data from the present study and on data from the first-in-human study with BAY1128688, a single-dose escalation study in healthy postmenopausal women (Bayer; data on file). PopPK and popPK/PD analyses were performed via

non-linear mixed-effects modeling methods applied in NONMEM v7.3 (ICON Development Solutions, Dublin, Ireland).

### 1.3 Evaluation of exploratory biomarkers for renal safety

To detect early signs of drug mediated kidney damage, the following clinically qualified markers were determined in 24-hour urine samples using technically validated methods:

- kidney injury molecule 1 (KIM-1);
- neutrophil gelatinase-associated lipocalin;
- albumin,
- cystatin C; and
- creatinine.

This evaluation was conducted in *postmenopausal* women (Part A).

## 2 Results

### 2.1 Supplemental tables

**Suppl. Table 1: Performance of the LC-MS/MS method for the quantification of BAY1128688 and BAY1107202 in plasma**

| Quality parameter                                                                               | Analyte                         |                                 |
|-------------------------------------------------------------------------------------------------|---------------------------------|---------------------------------|
|                                                                                                 | BAY1128688                      | BAY1107202                      |
| Calibration range                                                                               | 1.00 (LLOQ) to 1000 µg/L (ULOQ) | 1.00 (LLOQ) to 1000 µg/L (ULOQ) |
| Calibration standards mean inter-assay accuracy of back-calculated concentrations (except LLOQ) | 99.0% to 102.0%                 | 98.6% and 101.0%                |
| Calibration standards precision (except LLOQ)                                                   | ≤ 5.6%.                         | ≤ 5.1%.                         |
| Accuracy at the lowest calibration standard (LLOQ)                                              | 101.0%                          | 100.0%                          |
| Precision at the lowest calibration standard (LLOQ)                                             | 6.9%,                           | 5.1%,                           |
| Concentration range of QC samples                                                               | 3.00 to 850 µg/L                | 3.00 to 850 µg/L                |
| QC samples accuracy                                                                             | 98.4% to 100.0%                 | 96.8% to 99.0%                  |
| QC samples precision                                                                            | 4.8% to 5.8%.                   | 3.7% to 6.0%.                   |

LC-MS/MS, liquid chromatography–tandem mass spectrometry; LLOQ, lower limit of quantitation; QC, quality control; ULOQ, upper limit of quantitation

Suppl. Table 2: Serum concentrations [nmol/L] of 17 steroids in postmenopausal women before, during, and after 14-day administration of BAY1128688

| Analyte (LLOQ)                              | Day | Placebo |        |       | 3 mg QD |   |        |       | 30 mg QD |   |        |       | 60 mg BID |   |        |       | 90 mg QD |   |        |       |       |
|---------------------------------------------|-----|---------|--------|-------|---------|---|--------|-------|----------|---|--------|-------|-----------|---|--------|-------|----------|---|--------|-------|-------|
|                                             |     | N       | Median | Min   | Max     | N | Median | Min   | Max      | N | Median | Min   | Max       | N | Median | Min   | Max      | N | Median | Min   | Max   |
| 11-Deoxycortisol<br>(0.014)                 | -0  | 7       | 0.49   | 0.28  | 1.26    | 5 | 0.59   | 0.45  | 0.79     | 7 | 0.44   | 0.14  | 0.92      | 7 | 0.41   | 0.23  | 1.08     | 7 | 0.46   | 0.17  | 2.01  |
|                                             | 1   | 7       | 0.35   | 0.24  | 1.13    | 5 | 0.38   | 0.19  | 0.50     | 7 | 0.31   | 0.18  | 1.18      | 7 | 0.56   | 0.17  | 1.30     | 7 | 0.47   | 0.20  | 1.04  |
|                                             | 6   | 7       | 0.58   | 0.21  | 1.42    | 5 | 0.37   | 0.18  | 0.96     | 7 | 0.24   | 0.14  | 0.86      | 7 | 0.34   | 0.16  | 0.75     | 7 | 0.44   | 0.17  | 0.82  |
|                                             | 13  | 7       | 0.48   | 0.23  | 0.70    | 5 | 0.42   | 0.17  | 0.66     | 7 | 0.38   | 0.15  | 0.66      | 7 | 0.46   | 0.12  | 0.75     | 7 | 0.28   | 0.14  | 0.39  |
|                                             | 14  | 7       | 0.50   | 0.43  | 1.38    | 5 | 0.33   | 0.15  | 0.84     | 7 | 0.35   | 0.14  | 1.03      | 7 | 0.50   | 0.28  | 0.72     | 7 | 0.33   | 0.13  | 0.82  |
|                                             | 15  | 7       | 0.49   | 0.25  | 0.98    | 5 | 0.38   | 0.16  | 0.79     | 7 | 0.42   | 0.13  | 1.30      | 7 | 0.40   | 0.21  | 0.71     | 7 | 0.40   | 0.16  | 0.53  |
|                                             | 19  | 7       | 0.35   | 0.25  | 0.74    | 5 | 0.20   | 0.15  | 0.80     | 7 | 0.33   | 0.14  | 0.71      | 7 | 0.38   | 0.23  | 0.72     | 7 | 0.30   | 0.20  | 0.54  |
| 11-Deoxycorticosterone<br>(0.023)           | -0  | 7       | 0.082  | 0.042 | 0.168   | 5 | 0.085  | 0.075 | 0.095    | 7 | 0.042  | 0.017 | 0.103     | 7 | 0.056  | 0.030 | 0.126    | 7 | 0.062  | 0.035 | 0.176 |
|                                             | 1   | 7       | 0.068  | 0.034 | 0.152   | 5 | 0.074  | 0.045 | 0.090    | 7 | 0.051  | 0.022 | 0.143     | 7 | 0.076  | 0.028 | 0.183    | 7 | 0.052  | 0.032 | 0.116 |
|                                             | 6   | 7       | 0.089  | 0.027 | 0.235   | 5 | 0.083  | 0.047 | 0.109    | 7 | 0.036  | 0.017 | 0.128     | 7 | 0.077  | 0.020 | 0.102    | 7 | 0.058  | 0.043 | 0.100 |
|                                             | 13  | 7       | 0.075  | 0.032 | 0.088   | 5 | 0.059  | 0.042 | 0.079    | 7 | 0.042  | 0.021 | 0.074     | 7 | 0.061  | 0.018 | 0.106    | 7 | 0.038  | 0.025 | 0.070 |
|                                             | 14  | 7       | 0.081  | 0.048 | 0.179   | 5 | 0.057  | 0.031 | 0.106    | 7 | 0.046  | 0.015 | 0.112     | 7 | 0.066  | 0.034 | 0.097    | 7 | 0.050  | 0.019 | 0.105 |
|                                             | 15  | 7       | 0.059  | 0.036 | 0.103   | 5 | 0.062  | 0.033 | 0.111    | 7 | 0.061  | 0.019 | 0.132     | 7 | 0.080  | 0.031 | 0.116    | 7 | 0.049  | 0.027 | 0.086 |
|                                             | 19  | 7       | 0.071  | 0.046 | 0.085   | 5 | 0.057  | 0.041 | 0.097    | 7 | 0.049  | 0.023 | 0.080     | 7 | 0.070  | 0.038 | 0.105    | 7 | 0.060  | 0.029 | 0.076 |
| 17 $\alpha$ -Hydroxyprogesterone<br>(0.038) | -0  | 7       | 0.52   | 0.22  | 0.64    | 5 | 0.53   | 0.37  | 0.61     | 7 | 0.35   | 0.17  | 0.52      | 7 | 0.44   | 0.34  | 0.94     | 7 | 0.38   | 0.20  | 0.89  |
|                                             | 1   | 7       | 0.44   | 0.30  | 0.65    | 5 | 0.38   | 0.24  | 0.50     | 7 | 0.33   | 0.23  | 1.03      | 7 | 0.45   | 0.29  | 0.94     | 7 | 0.47   | 0.21  | 0.80  |
|                                             | 6   | 7       | 0.48   | 0.34  | 0.83    | 5 | 0.39   | 0.23  | 0.50     | 7 | 0.27   | 0.15  | 0.66      | 7 | 0.41   | 0.25  | 0.59     | 7 | 0.45   | 0.18  | 0.80  |
|                                             | 13  | 7       | 0.40   | 0.31  | 0.54    | 5 | 0.29   | 0.23  | 0.58     | 7 | 0.33   | 0.18  | 0.46      | 7 | 0.33   | 0.18  | 0.70     | 7 | 0.28   | 0.15  | 0.52  |
|                                             | 14  | 7       | 0.65   | 0.47  | 0.91    | 5 | 0.30   | 0.19  | 0.64     | 7 | 0.30   | 0.15  | 0.56      | 7 | 0.43   | 0.30  | 0.64     | 7 | 0.28   | 0.17  | 1.01  |
|                                             | 15  | 7       | 0.45   | 0.29  | 0.53    | 5 | 0.30   | 0.21  | 0.56     | 7 | 0.37   | 0.17  | 0.94      | 7 | 0.43   | 0.30  | 0.66     | 7 | 0.30   | 0.16  | 0.61  |
|                                             | 19  | 7       | 0.46   | 0.24  | 0.56    | 5 | 0.33   | 0.22  | 0.44     | 7 | 0.30   | 0.18  | 0.79      | 7 | 0.45   | 0.27  | 0.56     | 7 | 0.34   | 0.18  | 0.57  |
| Aldosterone<br>(0.139)                      | -0  | 7       | 0.095  | 0.060 | 0.120   | 5 | 0.120  | 0.067 | 0.325    | 7 | 0.079  | 0.027 | 0.192     | 6 | 0.091  | 0.055 | 0.118    | 5 | 0.108  | 0.033 | 0.187 |
|                                             | 1   | 7       | 0.082  | 0.028 | 0.171   | 4 | 0.131  | 0.097 | 0.286    | 7 | 0.073  | 0.033 | 0.163     | 7 | 0.110  | 0.057 | 0.184    | 6 | 0.155  | 0.060 | 0.220 |
|                                             | 6   | 7       | 0.087  | 0.041 | 0.172   | 5 | 0.306  | 0.065 | 0.663    | 7 | 0.132  | 0.071 | 0.411     | 7 | 0.098  | 0.050 | 0.228    | 6 | 0.095  | 0.075 | 0.201 |
|                                             | 13  | 7       | 0.067  | 0.036 | 0.116   | 4 | 0.137  | 0.088 | 0.152    | 7 | 0.060  | 0.052 | 0.131     | 7 | 0.092  | 0.059 | 0.149    | 6 | 0.060  | 0.030 | 0.122 |
|                                             | 14  | 7       | 0.070  | 0.057 | 0.251   | 4 | 0.162  | 0.122 | 0.333    | 7 | 0.070  | 0.050 | 0.113     | 7 | 0.088  | 0.071 | 0.179    | 6 | 0.089  | 0.055 | 0.136 |
|                                             | 15  | 7       | 0.084  | 0.071 | 0.264   | 4 | 0.181  | 0.102 | 0.424    | 7 | 0.139  | 0.045 | 0.265     | 7 | 0.165  | 0.029 | 0.277    | 7 | 0.126  | 0.033 | 0.217 |
|                                             | 19  | 7       | 0.078  | 0.039 | 0.158   | 4 | 0.225  | 0.060 | 0.266    | 7 | 0.096  | 0.061 | 0.358     | 7 | 0.098  | 0.044 | 0.164    | 6 | 0.088  | 0.059 | 0.208 |

| Analyte (LLOQ)          | Day | Placebo |        |      |      | 3 mg QD |        |      |      | 30 mg QD |        |      |      | 60 mg BID |        |      |      | 90 mg QD |        |      |      |
|-------------------------|-----|---------|--------|------|------|---------|--------|------|------|----------|--------|------|------|-----------|--------|------|------|----------|--------|------|------|
|                         |     | N       | Median | Min  | Max  | N       | Median | Min  | Max  | N        | Median | Min  | Max  | N         | Median | Min  | Max  | N        | Median | Min  | Max  |
| Androstenedione (0.028) | -0  | 7       | 1.05   | 0.89 | 1.82 | 5       | 1.45   | 1.33 | 2.20 | 7        | 1.21   | 0.94 | 2.06 | 7         | 1.38   | 0.93 | 2.06 | 7        | 1.24   | 1.04 | 1.82 |
|                         | 1   | 7       | 1.10   | 0.68 | 1.74 | 5       | 1.32   | 0.86 | 1.91 | 7        | 1.43   | 0.94 | 2.09 | 7         | 1.47   | 1.02 | 2.20 | 7        | 1.29   | 1.02 | 1.79 |
|                         | 6   | 7       | 1.32   | 0.79 | 2.04 | 5       | 1.69   | 0.93 | 2.65 | 7        | 1.40   | 0.71 | 1.99 | 7         | 1.19   | 0.77 | 1.93 | 7        | 1.30   | 0.80 | 2.33 |
|                         | 13  | 7       | 1.00   | 0.81 | 1.93 | 5       | 1.17   | 0.90 | 2.16 | 7        | 1.14   | 0.95 | 1.66 | 7         | 1.18   | 0.62 | 2.09 | 7        | 0.96   | 0.81 | 1.41 |
|                         | 14  | 7       | 1.75   | 0.87 | 2.79 | 5       | 1.67   | 0.87 | 1.93 | 7        | 1.30   | 1.00 | 2.15 | 7         | 1.47   | 0.86 | 2.63 | 7        | 1.06   | 0.90 | 1.54 |
|                         | 15  | 7       | 1.12   | 0.65 | 2.84 | 5       | 1.09   | 0.91 | 2.44 | 7        | 1.22   | 0.80 | 2.77 | 7         | 1.53   | 0.81 | 2.42 | 7        | 1.08   | 0.86 | 1.64 |
|                         | 19  | 7       | 0.92   | 0.74 | 1.78 | 5       | 1.04   | 0.73 | 2.06 | 7        | 1.24   | 0.88 | 1.63 | 7         | 1.30   | 0.93 | 1.70 | 7        | 1.15   | 0.79 | 1.56 |
| Androsterone (0.104)    | -0  | 5       | 0.15   | 0.05 | 0.27 | 5       | 0.26   | 0.16 | 0.49 | 7        | 0.23   | 0.12 | 0.57 | 6         | 0.18   | 0.09 | 0.22 | 6        | 0.21   | 0.11 | 0.24 |
|                         | 1   | 5       | 0.11   | 0.02 | 0.27 | 3       | 0.32   | 0.28 | 0.47 | 7        | 0.31   | 0.10 | 0.82 | 7         | 0.38   | 0.12 | 0.42 | 7        | 0.35   | 0.17 | 0.76 |
|                         | 6   | 6       | 0.15   | 0.11 | 0.19 | 5       | 0.25   | 0.16 | 0.47 | 7        | 0.48   | 0.22 | 1.06 | 7         | 0.60   | 0.31 | 0.79 | 7        | 0.81   | 0.22 | 0.94 |
|                         | 13  | 5       | 0.18   | 0.12 | 0.23 | 5       | 0.30   | 0.16 | 0.50 | 7        | 0.34   | 0.21 | 1.25 | 7         | 0.49   | 0.24 | 1.07 | 7        | 0.62   | 0.11 | 1.16 |
|                         | 14  | 6       | 0.19   | 0.08 | 0.25 | 5       | 0.29   | 0.14 | 0.46 | 7        | 0.47   | 0.24 | 1.00 | 7         | 0.58   | 0.19 | 1.22 | 7        | 0.74   | 0.35 | 0.95 |
|                         | 15  | 6       | 0.14   | 0.08 | 0.23 | 5       | 0.24   | 0.15 | 0.48 | 7        | 0.25   | 0.13 | 0.73 | 7         | 0.49   | 0.16 | 0.73 | 6        | 0.57   | 0.25 | 0.75 |
|                         | 19  | 7       | 0.13   | 0.09 | 0.18 | 5       | 0.18   | 0.11 | 0.42 | 7        | 0.22   | 0.08 | 0.59 | 5         | 0.26   | 0.14 | 0.31 | 6        | 0.24   | 0.10 | 0.35 |
| Corticosterone (0.022)  | -0  | 7       | 12.2   | 5.1  | 14.7 | 5       | 13.7   | 9.4  | 17.5 | 7        | 8.3    | 3.0  | 17.2 | 7         | 11.5   | 4.4  | 23.8 | 7        | 7.8    | 3.7  | 24.7 |
|                         | 1   | 7       | 8.0    | 3.0  | 15.0 | 5       | 5.7    | 3.5  | 8.8  | 7        | 5.1    | 2.1  | 21.8 | 7         | 13.7   | 2.9  | 27.8 | 7        | 5.9    | 3.9  | 12.9 |
|                         | 6   | 7       | 6.7    | 3.8  | 24.1 | 5       | 6.4    | 5.0  | 12.0 | 7        | 5.2    | 2.3  | 19.3 | 7         | 10.9   | 2.4  | 16.8 | 7        | 7.6    | 2.9  | 11.2 |
|                         | 13  | 7       | 8.9    | 3.6  | 19.8 | 5       | 6.3    | 5.2  | 14.5 | 7        | 5.5    | 2.4  | 11.2 | 7         | 15.2   | 2.6  | 20.2 | 7        | 4.4    | 3.4  | 7.9  |
|                         | 14  | 7       | 12.0   | 6.7  | 34.0 | 5       | 6.0    | 3.9  | 21.7 | 7        | 4.5    | 2.5  | 15.5 | 7         | 14.1   | 5.9  | 18.1 | 7        | 7.8    | 1.4  | 11.0 |
|                         | 15  | 7       | 7.0    | 5.6  | 32.9 | 5       | 4.9    | 3.4  | 13.8 | 7        | 8.7    | 4.4  | 21.5 | 7         | 14.8   | 4.5  | 21.2 | 7        | 5.8    | 3.7  | 9.5  |
|                         | 19  | 7       | 6.6    | 4.2  | 11.2 | 5       | 5.7    | 3.3  | 12.5 | 7        | 4.6    | 1.7  | 14.4 | 7         | 9.6    | 3.5  | 16.6 | 7        | 5.1    | 3.0  | 11.6 |
| Cortisol (0.69)         | -0  | 7       | 336    | 211  | 358  | 5       | 372    | 306  | 407  | 7        | 320    | 194  | 420  | 7         | 336    | 208  | 455  | 7        | 254    | 152  | 493  |
|                         | 1   | 7       | 289    | 170  | 363  | 5       | 258    | 197  | 316  | 7        | 245    | 154  | 483  | 7         | 346    | 162  | 486  | 7        | 278    | 179  | 347  |
|                         | 6   | 7       | 275    | 202  | 425  | 5       | 267    | 220  | 372  | 7        | 247    | 165  | 505  | 7         | 306    | 168  | 403  | 7        | 275    | 147  | 378  |
|                         | 13  | 7       | 274    | 183  | 425  | 5       | 246    | 226  | 417  | 7        | 246    | 179  | 400  | 7         | 358    | 171  | 418  | 7        | 252    | 149  | 296  |
|                         | 14  | 7       | 371    | 248  | 598  | 5       | 263    | 214  | 464  | 7        | 296    | 172  | 405  | 7         | 335    | 277  | 407  | 7        | 261    | 125  | 363  |
|                         | 15  | 7       | 257    | 237  | 502  | 5       | 286    | 222  | 422  | 7        | 324    | 232  | 530  | 7         | 364    | 267  | 433  | 7        | 285    | 237  | 362  |
|                         | 19  | 7       | 266    | 219  | 343  | 5       | 314    | 200  | 373  | 7        | 266    | 175  | 460  | 7         | 309    | 148  | 422  | 7        | 241    | 180  | 368  |
| Cortisone (0.069)       | -0  | 7       | 58.4   | 53.5 | 62.4 | 5       | 52.0   | 49.6 | 61.4 | 7        | 62.7   | 54.6 | 76.3 | 7         | 50.0   | 47.3 | 69.5 | 7        | 56.8   | 44.3 | 67.3 |
|                         | 1   | 7       | 53.9   | 50.2 | 70.8 | 5       | 47.5   | 42.5 | 62.8 | 7        | 57.4   | 47.1 | 71.3 | 7         | 48.8   | 38.5 | 74.4 | 7        | 55.3   | 48.1 | 65.6 |
|                         | 6   | 7       | 58.8   | 54.2 | 63.7 | 5       | 47.7   | 41.4 | 65.4 | 7        | 55.7   | 51.5 | 70.5 | 7         | 45.3   | 34.7 | 64.9 | 7        | 47.3   | 37.9 | 68.4 |
|                         | 13  | 7       | 52.6   | 50.4 | 65.6 | 5       | 47.2   | 40.0 | 65.1 | 7        | 58.0   | 47.8 | 66.9 | 7         | 49.2   | 36.9 | 66.5 | 7        | 46.5   | 38.7 | 53.9 |
|                         | 14  | 7       | 59.9   | 56.0 | 70.9 | 5       | 49.4   | 40.6 | 63.9 | 7        | 62.9   | 52.4 | 66.3 | 7         | 51.2   | 42.2 | 67.3 | 7        | 45.3   | 29.7 | 54.6 |
|                         | 15  | 7       | 59.6   | 53.7 | 75.2 | 5       | 48.6   | 43.2 | 70.8 | 7        | 65.2   | 50.4 | 69.8 | 7         | 51.7   | 44.7 | 70.9 | 7        | 51.9   | 40.3 | 63.3 |
|                         | 19  | 7       | 54.6   | 48.4 | 76.4 | 5       | 43.6   | 37.1 | 66.9 | 7        | 62.1   | 51.0 | 64.7 | 7         | 46.4   | 42.9 | 66.9 | 7        | 50.9   | 39.8 | 71.4 |

| Analyte (LLOQ)                        | Day | Placebo |        |       |       | 3 mg QD |        |       |       | 30 mg QD |        |       |       | 60 mg BID |        |       |       | 90 mg QD |        |       |       |
|---------------------------------------|-----|---------|--------|-------|-------|---------|--------|-------|-------|----------|--------|-------|-------|-----------|--------|-------|-------|----------|--------|-------|-------|
|                                       |     | N       | Median | Min   | Max   | N       | Median | Min   | Max   | N        | Median | Min   | Max   | N         | Median | Min   | Max   | N        | Median | Min   | Max   |
| Dehydroepiandrosterone (0.416)        | -0  | 7       | 4.6    | 3.0   | 11.3  | 5       | 6.9    | 5.3   | 12.4  | 7        | 6.4    | 4.3   | 12.8  | 7         | 5.9    | 3.0   | 7.1   | 7        | 6.3    | 2.5   | 9.1   |
|                                       | 1   | 7       | 4.3    | 3.2   | 10.2  | 5       | 4.9    | 3.4   | 9.4   | 7        | 8.5    | 3.4   | 12.2  | 7         | 5.0    | 4.2   | 7.6   | 7        | 4.8    | 3.3   | 8.6   |
|                                       | 6   | 7       | 4.3    | 3.7   | 13.3  | 5       | 6.3    | 4.5   | 9.3   | 7        | 7.4    | 2.1   | 13.3  | 7         | 4.8    | 2.7   | 7.5   | 7        | 5.0    | 2.9   | 12.3  |
|                                       | 13  | 7       | 3.8    | 3.0   | 8.0   | 5       | 5.3    | 3.7   | 12.0  | 7        | 5.1    | 2.8   | 11.0  | 7         | 4.9    | 2.4   | 6.7   | 7        | 4.3    | 1.7   | 6.2   |
|                                       | 14  | 7       | 7.4    | 3.6   | 12.6  | 5       | 5.9    | 3.7   | 10.9  | 7        | 5.9    | 3.0   | 112.0 | 7         | 5.6    | 3.1   | 9.1   | 7        | 3.6    | 2.9   | 5.6   |
|                                       | 15  | 7       | 4.1    | 3.1   | 8.6   | 5       | 4.7    | 3.9   | 11.8  | 7        | 7.5    | 2.4   | 24.7  | 7         | 5.6    | 3.3   | 8.9   | 7        | 4.3    | 2.3   | 7.7   |
|                                       | 19  | 7       | 3.5    | 3.4   | 8.8   | 5       | 4.1    | 3.2   | 10.7  | 7        | 6.9    | 3.0   | 10.9  | 7         | 5.0    | 4.1   | 8.9   | 7        | 5.7    | 2.5   | 8.2   |
| Dehydroepiandrosterone sulfate (49.9) | -0  | 7       | 1557   | 864   | 2756  | 5       | 1954   | 1522  | 3546  | 7        | 2199   | 588   | 3669  | 7         | 1463   | 806   | 2555  | 7        | 2150   | 612   | 4725  |
|                                       | 1   | 7       | 1299   | 754   | 2228  | 5       | 1873   | 1278  | 3075  | 7        | 2624   | 755   | 3947  | 7         | 1465   | 993   | 3249  | 7        | 2289   | 800   | 5494  |
|                                       | 6   | 7       | 1664   | 979   | 3317  | 5       | 2049   | 1578  | 3726  | 7        | 3655   | 881   | 4554  | 7         | 2154   | 1401  | 4376  | 7        | 2649   | 909   | 6522  |
|                                       | 13  | 7       | 1526   | 763   | 2815  | 5       | 1858   | 1369  | 4053  | 7        | 2336   | 791   | 3978  | 7         | 1461   | 1153  | 3325  | 7        | 2282   | 673   | 5692  |
|                                       | 14  | 7       | 1248   | 855   | 2489  | 5       | 2100   | 1488  | 3845  | 7        | 2492   | 875   | 3439  | 7         | 1828   | 884   | 2897  | 7        | 2202   | 693   | 5112  |
|                                       | 15  | 7       | 1280   | 1041  | 2929  | 5       | 2630   | 1595  | 4270  | 7        | 2742   | 685   | 4706  | 7         | 1405   | 1137  | 3099  | 7        | 2057   | 744   | 5271  |
|                                       | 19  | 7       | 1478   | 882   | 2749  | 5       | 1890   | 1411  | 4369  | 7        | 2363   | 765   | 3012  | 7         | 1499   | 1096  | 2883  | 7        | 1921   | 683   | 4867  |
| Dihydrotestosterone (0.041)           | -0  | 5       | 0.12   | 0.00  | 0.23  | 5       | 0.22   | 0.13  | 0.56  | 7        | 0.11   | 0.00  | 0.59  | 4         | 0.14   | 0.12  | 0.16  | 6        | 0.16   | 0.12  | 0.32  |
|                                       | 1   | 5       | 0.14   | 0.12  | 0.26  | 5       | 0.30   | 0.17  | 0.58  | 7        | 0.09   | 0.06  | 0.61  | 3         | 0.22   | 0.13  | 0.36  | 6        | 0.26   | 0.14  | 0.46  |
|                                       | 6   | 6       | 0.17   | 0.15  | 0.29  | 4       | 0.33   | 0.17  | 0.48  | 7        | 0.20   | 0.04  | 0.71  | 7         | 0.20   | 0.14  | 0.25  | 7        | 0.31   | 0.16  | 0.58  |
|                                       | 13  | 5       | 0.20   | 0.12  | 0.23  | 4       | 0.32   | 0.17  | 0.48  | 7        | 0.12   | 0.04  | 0.60  | 7         | 0.27   | 0.19  | 0.34  | 7        | 0.29   | 0.18  | 0.48  |
|                                       | 14  | 5       | 0.17   | 0.06  | 0.22  | 5       | 0.35   | 0.14  | 0.57  | 7        | 0.18   | 0.03  | 0.67  | 6         | 0.29   | 0.19  | 0.47  | 7        | 0.33   | 0.22  | 0.57  |
|                                       | 15  | 5       | 0.19   | 0.00  | 0.24  | 5       | 0.32   | 0.14  | 0.55  | 7        | 0.16   | 0.07  | 0.65  | 5         | 0.23   | 0.16  | 0.37  | 6        | 0.28   | 0.25  | 0.42  |
|                                       | 19  | 4       | 0.20   | 0.04  | 0.22  | 5       | 0.23   | 0.14  | 0.56  | 7        | 0.08   | 0.00  | 0.49  | 5         | 0.15   | 0.12  | 0.21  | 5        | 0.20   | 0.16  | 0.31  |
| 17 $\beta$ -estradiol (0.018)         | -0  | 3       | 0.024  | 0.004 | 0.027 | 4       | 0.025  | 0.014 | 0.197 | 7        | 0.008  | 0.001 | 0.019 | 3         | 0.017  | 0.017 | 0.032 | 3        | 0.013  | 0.013 | 0.022 |
|                                       | 1   | 4       | 0.013  | 0.004 | 0.041 | 3       | 0.063  | 0.021 | 0.118 | 7        | 0.011  | 0.003 | 0.097 | 2         | 0.020  | 0.019 | 0.021 | 2        | 0.017  | 0.017 | 0.017 |
|                                       | 6   | 5       | 0.016  | 0.000 | 0.029 | 4       | 0.026  | 0.012 | 0.177 | 7        | 0.015  | 0.007 | 0.023 | 1         | 0.015  | 0.015 | 0.015 | 1        | 0.017  | 0.017 | 0.017 |
|                                       | 13  | 3       | 0.008  | 0.005 | 0.021 | 4       | 0.026  | 0.020 | 0.474 | 7        | 0.007  | 0.000 | 0.028 | 2         | 0.037  | 0.023 | 0.051 | 2        | 0.021  | 0.018 | 0.025 |
|                                       | 14  | 4       | 0.010  | 0.000 | 0.020 | 4       | 0.022  | 0.015 | 0.121 | 7        | 0.007  | 0.000 | 0.024 | 2         | 0.023  | 0.022 | 0.024 | 5        | 0.013  | 0.013 | 0.025 |
|                                       | 15  | 3       | 0.014  | 0.006 | 0.021 | 4       | 0.021  | 0.014 | 0.516 | 7        | 0.008  | 0.000 | 0.033 | 0         | -      | -     | -     | 1        | 0.020  | 0.020 | 0.020 |
|                                       | 19  | 4       | 0.015  | 0.007 | 0.028 | 3       | 0.021  | 0.013 | 0.167 | 7        | 0.008  | 0.000 | 0.028 | 2         | 0.026  | 0.016 | 0.035 | 1        | 0.016  | 0.016 | 0.016 |
| Estrone (0.111)                       | -0  | 3       | 0.083  | 0.049 | 0.087 | 4       | 0.081  | 0.063 | 0.373 | 7        | 0.052  | 0.039 | 0.105 | 3         | 0.084  | 0.053 | 0.126 | 6        | 0.058  | 0.041 | 0.094 |
|                                       | 1   | 4       | 0.060  | 0.038 | 0.096 | 4       | 0.094  | 0.043 | 0.105 | 7        | 0.066  | 0.046 | 0.136 | 4         | 0.072  | 0.048 | 0.113 | 6        | 0.065  | 0.043 | 0.104 |
|                                       | 6   | 4       | 0.056  | 0.041 | 0.071 | 4       | 0.077  | 0.046 | 0.154 | 7        | 0.066  | 0.026 | 0.118 | 3         | 0.087  | 0.039 | 0.094 | 7        | 0.061  | 0.041 | 0.085 |
|                                       | 13  | 4       | 0.054  | 0.048 | 0.078 | 4       | 0.086  | 0.058 | 0.517 | 7        | 0.061  | 0.040 | 0.113 | 3         | 0.059  | 0.049 | 0.080 | 3        | 0.049  | 0.040 | 0.056 |
|                                       | 14  | 6       | 0.042  | 0.037 | 0.107 | 4       | 0.076  | 0.050 | 0.181 | 7        | 0.058  | 0.000 | 0.088 | 3         | 0.106  | 0.038 | 0.120 | 3        | 0.053  | 0.042 | 0.067 |
|                                       | 15  | 4       | 0.054  | 0.051 | 0.076 | 3       | 0.111  | 0.073 | 0.422 | 7        | 0.044  | 0.000 | 0.135 | 2         | 0.104  | 0.096 | 0.112 | 4        | 0.044  | 0.040 | 0.052 |
|                                       | 19  | 4       | 0.077  | 0.041 | 0.095 | 5       | 0.065  | 0.040 | 0.215 | 7        | 0.044  | 0.037 | 0.076 | 3         | 0.087  | 0.055 | 0.145 | 6        | 0.053  | 0.039 | 0.066 |



| Analyte<br>(LLOQ)          | Day | Placebo |        |      |      | 3 mg QD |        |      |      | 30 mg QD |        |      |      | 60 mg BID |        |      |      | 90 mg QD |        |      |      |
|----------------------------|-----|---------|--------|------|------|---------|--------|------|------|----------|--------|------|------|-----------|--------|------|------|----------|--------|------|------|
|                            |     | N       | Median | Min  | Max  | N       | Median | Min  | Max  | N        | Median | Min  | Max  | N         | Median | Min  | Max  | N        | Median | Min  | Max  |
| Etiocholanolone<br>(0.207) | -0  | 4       | 0.12   | 0.04 | 0.18 | 4       | 0.19   | 0.09 | 0.21 | 7        | 0.16   | 0.09 | 0.28 | 4         | 0.21   | 0.14 | 0.29 | 5        | 0.18   | 0.07 | 0.25 |
|                            | 1   | 4       | 0.15   | 0.10 | 0.25 | 4       | 0.20   | 0.10 | 0.28 | 7        | 0.18   | 0.06 | 0.29 | 5         | 0.28   | 0.08 | 0.38 | 5        | 0.24   | 0.12 | 0.34 |
|                            | 6   | 4       | 0.13   | 0.10 | 0.19 | 4       | 0.19   | 0.10 | 0.25 | 7        | 0.31   | 0.08 | 0.37 | 7         | 0.24   | 0.12 | 0.67 | 6        | 0.44   | 0.16 | 0.58 |
|                            | 13  | 5       | 0.14   | 0.07 | 0.18 | 4       | 0.19   | 0.08 | 0.26 | 7        | 0.18   | 0.14 | 0.33 | 7         | 0.26   | 0.13 | 0.56 | 6        | 0.33   | 0.19 | 0.51 |
|                            | 14  | 6       | 0.14   | 0.07 | 0.28 | 4       | 0.19   | 0.08 | 0.27 | 7        | 0.26   | 0.16 | 0.30 | 7         | 0.35   | 0.09 | 0.50 | 7        | 0.28   | 0.08 | 0.51 |
|                            | 15  | 5       | 0.13   | 0.07 | 0.24 | 3       | 0.19   | 0.15 | 0.27 | 7        | 0.24   | 0.12 | 0.34 | 7         | 0.24   | 0.08 | 0.46 | 6        | 0.36   | 0.14 | 0.59 |
|                            | 19  | 5       | 0.11   | 0.09 | 0.18 | 4       | 0.17   | 0.07 | 0.22 | 7        | 0.17   | 0.11 | 0.25 | 5         | 0.24   | 0.08 | 0.39 | 6        | 0.24   | 0.08 | 0.47 |
| Progesterone<br>(0.048)    | -0  | 7       | 0.12   | 0.07 | 0.17 | 5       | 0.13   | 0.07 | 0.17 | 7        | 0.11   | 0.07 | 0.11 | 7         | 0.09   | 0.07 | 0.19 | 7        | 0.11   | 0.07 | 0.15 |
|                            | 1   | 7       | 0.12   | 0.08 | 0.17 | 5       | 0.12   | 0.08 | 0.20 | 7        | 0.10   | 0.08 | 0.25 | 7         | 0.10   | 0.07 | 0.26 | 7        | 0.12   | 0.06 | 0.14 |
|                            | 6   | 7       | 0.13   | 0.07 | 0.28 | 5       | 0.10   | 0.08 | 0.14 | 7        | 0.10   | 0.07 | 0.18 | 7         | 0.11   | 0.07 | 0.14 | 7        | 0.11   | 0.07 | 0.14 |
|                            | 13  | 7       | 0.11   | 0.07 | 0.13 | 5       | 0.09   | 0.07 | 0.15 | 7        | 0.09   | 0.06 | 0.14 | 7         | 0.10   | 0.06 | 0.16 | 7        | 0.08   | 0.06 | 0.13 |
|                            | 14  | 7       | 0.12   | 0.10 | 0.22 | 5       | 0.11   | 0.08 | 0.16 | 7        | 0.09   | 0.06 | 0.16 | 7         | 0.11   | 0.08 | 0.17 | 7        | 0.10   | 0.07 | 0.17 |
|                            | 15  | 7       | 0.10   | 0.09 | 0.16 | 5       | 0.09   | 0.08 | 0.15 | 7        | 0.11   | 0.08 | 0.22 | 7         | 0.09   | 0.07 | 0.18 | 7        | 0.09   | 0.07 | 0.14 |
|                            | 19  | 7       | 0.11   | 0.08 | 0.14 | 5       | 0.09   | 0.08 | 0.13 | 7        | 0.09   | 0.06 | 0.20 | 7         | 0.10   | 0.07 | 0.13 | 7        | 0.08   | 0.06 | 0.16 |
| Testosterone<br>(0.01)     | -0  | 7       | 0.44   | 0.25 | 0.52 | 5       | 0.39   | 0.34 | 0.73 | 7        | 0.47   | 0.31 | 0.59 | 7         | 0.51   | 0.38 | 0.71 | 7        | 0.41   | 0.30 | 1.07 |
|                            | 1   | 7       | 0.47   | 0.22 | 0.59 | 5       | 0.41   | 0.31 | 0.71 | 7        | 0.47   | 0.28 | 0.64 | 7         | 0.47   | 0.40 | 0.67 | 7        | 0.36   | 0.26 | 0.89 |
|                            | 6   | 7       | 0.44   | 0.23 | 0.51 | 5       | 0.38   | 0.31 | 0.70 | 7        | 0.37   | 0.25 | 0.55 | 7         | 0.42   | 0.32 | 0.51 | 7        | 0.30   | 0.23 | 0.79 |
|                            | 13  | 7       | 0.39   | 0.28 | 0.50 | 5       | 0.31   | 0.29 | 0.72 | 7        | 0.39   | 0.26 | 0.60 | 7         | 0.39   | 0.30 | 0.60 | 7        | 0.28   | 0.24 | 0.73 |
|                            | 14  | 7       | 0.54   | 0.29 | 0.62 | 5       | 0.40   | 0.30 | 0.74 | 7        | 0.43   | 0.12 | 0.49 | 7         | 0.47   | 0.34 | 0.76 | 7        | 0.30   | 0.26 | 0.81 |
|                            | 15  | 7       | 0.47   | 0.19 | 0.57 | 5       | 0.34   | 0.28 | 0.84 | 7        | 0.48   | 0.30 | 0.62 | 7         | 0.51   | 0.39 | 0.81 | 7        | 0.31   | 0.25 | 0.91 |
|                            | 19  | 7       | 0.42   | 0.24 | 0.58 | 5       | 0.31   | 0.25 | 0.69 | 7        | 0.47   | 0.37 | 0.65 | 7         | 0.52   | 0.48 | 0.79 | 7        | 0.39   | 0.32 | 1.03 |

BID, twice daily; LLOQ, lower limit of quantitation; Max, maximum; Min, minimum; N, number of valid cases; QD, once daily.

Invalid values and values below the limit of detection were excluded from statistics.

Suppl. Table 3: PK parameters of BAY1128688 and its metabolite M-7 in plasma (geometric mean/%CV) obtained after single and multiple oral administration of different doses of BAY1128688 to post- and premenopausal women

| Analyte                                               | Parameter                         | Unit   | Dose group                     |                                |                                |                                |
|-------------------------------------------------------|-----------------------------------|--------|--------------------------------|--------------------------------|--------------------------------|--------------------------------|
|                                                       |                                   |        | 3 mg QD<br>(N=5)               | 30 mg QD<br>(N=7)              | 90 mg QD<br>(N=7)              | 60 mg BID<br>(N=7)             |
| <b>(A) Postmenopausal women</b>                       |                                   |        |                                |                                |                                |                                |
| <b>Single-dose administration (Day 1/Period 1)</b>    |                                   |        |                                |                                |                                |                                |
| Parent drug                                           | C <sub>max</sub>                  | µg/L   | 141 / 21.5                     | 2060 / 23.6                    | 6960 / 19.6                    | 3650 / 52.9                    |
|                                                       | C <sub>max</sub> /D               | 1/L    | 0.0469 / 21.5                  | 0.0687 / 23.6                  | 0.0773 / 19.6                  | 0.0608 / 52.9                  |
|                                                       | t <sub>max</sub>                  | h      | 3.00 (1.48–3.97) <sup>a</sup>  | 2.02 (0.983–3.05) <sup>a</sup> | 1.52 (0.983-3.05) <sup>a</sup> | 2.02 (1.02-5.98) <sup>a</sup>  |
|                                                       | AUC(0-24)                         | µg·h/L | 1420 / 32.2                    | 15600 / 22.7                   | 56200 / 18.0                   | 23400 / 34.6 <sup>b</sup>      |
|                                                       | AUC                               | µg·h/L | 2430 / 50.8 <sup>c</sup>       | 20400 / 27.8                   | 71300 / 23.3                   | 42400 / 33.5                   |
|                                                       | AUC/D                             | h/L    | 0.810 / 50.8 <sup>c</sup>      | 0.680 / 27.8                   | 0.792 / 23.3                   | 0.706 / 33.5                   |
|                                                       | t <sub>1/2</sub>                  | h      | 25.1 / 15.8 <sup>c</sup>       | 27.5 / 44.9                    | 31.0 / 29.5                    | 23.1 / 21.9                    |
| M-7                                                   | AUC                               | µg/L   | n.c.                           | 2060 / 36.4 <sup>d</sup>       | 4500 / 30.4 <sup>d</sup>       | 6830 / 45.3 <sup>e</sup>       |
|                                                       | MR                                | ---    | 0.0149 / 117                   | 0.0234 / 25.5                  | 0.0080 / 30.5                  | 0.0231 / 23.7                  |
| <b>Multiple-dose administration (Day 14/Period 2)</b> |                                   |        |                                |                                |                                |                                |
| Parent drug                                           | C <sub>max,MD</sub>               | µg/L   | 207 / 36.8                     | 1990 / 18.7                    | 8510 / 21.7                    | 7220 / 43.1                    |
|                                                       | C <sub>max</sub> /D <sub>MD</sub> | 1/L    | 0.0689 / 36.8                  | 0.0662 / 18.7                  | 0.0946 / 21.7                  | 0.0601 / 43.1                  |
|                                                       | t <sub>max,MD</sub>               | h      | 1.50 (0.967-3.95) <sup>a</sup> | 2.97 (1.48-6.00) <sup>a</sup>  | 3.00 (1.50-3.02) <sup>a</sup>  | 2.03 (0.983-3.07) <sup>a</sup> |
|                                                       | C <sub>min,MD</sub>               | µg/L   | 48.8 / 76.9                    | 265 / 28.0                     | 1150 / 43.5                    | 2640 / 47.7                    |
|                                                       | AUC(0-24) <sub>MD</sub>           | µg·h/L | 2280 / 52.7                    | 19200 / 17.3                   | 79100 / 26.0                   | 109000 / 41.8 <sup>g</sup>     |
|                                                       | AUC(0-24)/D <sub>MD</sub>         | h/L    | 0.762 / 52.7                   | 0.640 / 17.3                   | 0.879 / 26.0                   | 0.905 / 41.8 <sup>f,g</sup>    |
|                                                       | R <sub>A</sub> AUC                | ---    | 1.61 / 25.6                    | 1.23 / 9.06                    | 1.41 / 12.9                    | 2.32 / 25.3                    |
|                                                       | R <sub>LIN</sub>                  | ---    | 1.02 / 17.6 <sup>c</sup>       | 0.940 / 13.2                   | 1.11 / 12.9                    | 1.28 / 19.2                    |
| M-7                                                   | AUC(0-24) <sub>MD</sub>           | µg·h/L | 225 / 64.1                     | 2060 / 31.3                    | 8800 / 40.6                    | 10200 / 38.2 <sup>g</sup>      |
|                                                       | R <sub>A</sub> AUC                | ---    | [16.1 / 157] <sup>c</sup>      | 6.90 / 21.0                    | 8.31 / 31.9                    | {33.3 / 50.0}                  |
|                                                       | MR                                | ---    | 0.121 / 65.5                   | 0.132 / 16.0                   | 0.136 / 26.0                   | 0.115 / 34.0                   |

Continued next page

## (B) Premenopausal women

|                                                                              |                  | 60 mg QD<br>(N=9)            | 60 mg BID<br>(N=9)            |
|------------------------------------------------------------------------------|------------------|------------------------------|-------------------------------|
| <b>Multiple-dose administration (Day &gt;14<sup>h</sup>/Treatment Cycle)</b> |                  |                              |                               |
| $C_{max,MD}$                                                                 | µg/L             | 4340 / 24.8                  | 6800 / 23.3                   |
| $C_{max}/D_{MD}$                                                             | 1/L              | 0.0724 / 24.8                | 0.0567 / 23.3                 |
| $t_{max,MD}$                                                                 | h                | 2.0 (1.5 - 4.0) <sup>a</sup> | 1.93 (1.0 - 4.0) <sup>a</sup> |
| $C_{min,MD}$                                                                 | µg/L             | 641 / 57.9                   | 2260 / 40.4                   |
| $AUC(0-24)_{MD}$                                                             | µg·h/L           | 42800 / 29.8                 | 98000 / 25.0 <sup>g</sup>     |
| $AUC(0-24)/D_{MD}$                                                           | h/L              | 0.713 / 29.8                 | 0.817 / 25.0 <sup>f, g</sup>  |
| <b>M-7</b>                                                                   | $AUC(0-24)_{MD}$ | 3070 / 79.2                  | 7160 / 60.3 <sup>g</sup>      |
|                                                                              | MR               | 0.0878 / 55.8                | 0.0895 / 41.4                 |

AUC, area under the plasma concentration vs time curve from zero to infinity after single (first) dose; AUC(0-t), AUC from time zero to time t hours post dose; BID, twice per day;  $C_{max}$ , maximum observed concentration in plasma (within the dosing interval);  $C_{min}$ , observed plasma concentration within the dosing interval; D, dose; MD, multiple dose; MR, metabolic ratio = metabolite AUC(0-24) to parent drug AUC(0-24) ratio (molecular weight adjusted); n.c., not calculated; QD, once per day;  $R_A$ AUC, accumulation ratio =  $AUC(0-24)_{multiple\ dose}/AUC(0-24)_{single\ dose}$ ;  $R_{LIN}$ , linearity index =  $AUC(0-24)_{multiple\ dose}/AUC$ ;  $t_{1/2}$ , half-life associated with the terminal slope;  $t_{max}$ , time to reach maximum drug concentration in plasma. (The time courses of trough concentrations indicate that PK steady state had been reached when the samples for multiple-dose PK profiles were taken (i.e., DAY14/Period 2 in postmenopausal women and Day≥15/Treatment Cycle in premenopausal women.)

[ ] implausible due to low concentrations of BAY1107202 after single dosing in period 1 and applied detection limit; { } implausible due to low AUC(0-12) of BAY1107202 after single dosing in period 1.

<sup>a</sup> median (range); <sup>b</sup> AUC(0-12); <sup>c</sup> n=4; <sup>d</sup> N=5; <sup>e</sup> n=6; <sup>f</sup> D = 2 · 60 mg = 120 mg; <sup>g</sup> extrapolated from AUC(0-12); <sup>h</sup> any day between Day 15 and Day 28.

**Suppl. Table 4: Most common treatment-emergent adverse events (*post- and premenopausal women*) – incidences without consideration of the drug-event relationship and incidences for events which the investigator considered study-drug related**

| MedDRA preferred term     | Postmenopausal women,<br>Placebo, Part A<br><br>(N=7) |                     | Postmenopausal women<br>BAY1128688, Part A<br><br>(N=26) |                     | Premenopausal women<br>BAY1128688, Part B<br><br>(N=18) |                     |
|---------------------------|-------------------------------------------------------|---------------------|----------------------------------------------------------|---------------------|---------------------------------------------------------|---------------------|
|                           | All                                                   | <i>Drug-related</i> | All                                                      | <i>Drug-related</i> | All                                                     | <i>Drug-related</i> |
| Headache                  | 0 (0%)                                                | 0                   | 7 (26.9%)                                                | 6 (23.1%)           | 7 (38.9%)                                               | 5 (27.8%)           |
| Nausea                    | 3 (42.9%)                                             | 3 (42.9%)           | 4 (15.4%)                                                | 4 (15.4%)           | 4 (22.2%)                                               | 4 (22.2%)           |
| Serum bilirubin increased | 0 (0%)                                                | 0                   | 7 (26.9%)                                                | 7 (26.9%)           | 1 (5.6%)                                                | 1 (5.6%)            |
| Vomiting                  | 2 (28.6%)                                             | 2 (28.6%)           | 4 (15.4%)                                                | 3 (11.5%)           | 2 (11.1%)                                               | 2 (11.1%)           |
| Nasopharyngitis           | 1 (14.3%)                                             | 0                   | 2 (7.7%)                                                 | 0                   | 4 (22.2%)                                               | 0                   |
| Decreased appetite        | 0                                                     | 0                   | 4 (15.4%)                                                | 4 (15.4%)           | 1 (5.6%)                                                | 1 (5.6%)            |

Numbers indicate the number of participants affected. Percentages refer to the total number of participants who received the respective treatment.

Suppl. Table 5: Treatment-emergent adverse events (post- and premenopausal women)

| Primary System Organ Class<br>Preferred Term<br>MedDRA version 18.1 | Postmenopausal women      |                  |                        |                  |                         |                  |                         |                   |                         |                  | Premenopausal women |                   |
|---------------------------------------------------------------------|---------------------------|------------------|------------------------|------------------|-------------------------|------------------|-------------------------|-------------------|-------------------------|------------------|---------------------|-------------------|
|                                                                     | Placebo<br>Single<br>dose | Placebo<br>14 d  | 3 mg<br>Single<br>dose | 3 mg<br>14 d     | 30 mg<br>Single<br>dose | 30 mg<br>14 d    | 60 mg<br>Single<br>dose | 60 mg BID<br>14 d | 90 mg<br>Single<br>dose | 90 mg<br>14 d    | 60 mg<br>28 d       | 60 mg BID<br>28 d |
|                                                                     | N=7<br>(100%)             | N=7<br>(100%)    | N=5<br>(100%)          | N=5<br>(100%)    | N=7<br>(100%)           | N=7<br>(100%)    | N=7<br>(100%)           | N=7<br>(100%)     | N=7<br>(100%)           | N=7<br>(100%)    | N=9<br>(100%)       | N=9<br>(100%)     |
| <i>Number of subjects (%) with at least one such adverse event</i>  | 3 (42.9%)                 | 6 (85.7%)        | 4 (80.0%)              | 3 (60.0%)        | 3 (42.9%)               | 5 (71.4%)        | 3 (42.9%)               | 6 (85.7%)         | 2 (28.6%)               | 6 (85.7%)        | 5 (55.6%)           | 6 (66.7%)         |
| <b>Gastrointestinal disorders</b>                                   | <b>1 (14.3%)</b>          | <b>2 (28.6%)</b> | <b>2 (40.0%)</b>       | <b>0</b>         | <b>1 (14.3%)</b>        | <b>3 (42.9%)</b> | <b>0</b>                | <b>0</b>          | <b>1 (14.3%)</b>        | <b>1 (14.3%)</b> | <b>2 (22.2%)</b>    | <b>3 (33.3%)</b>  |
| Abdominal distension                                                | 0                         | 0                | 0                      | 0                | 0                       | 0                | 0                       | 0                 | 0                       | 1 (14.3%)        | 0                   | 0                 |
| Abdominal pain lower                                                | 0                         | 0                | 2 (40.0%)              | 0                | 0                       | 0                | 0                       | 0                 | 0                       | 0                | 0                   | 0                 |
| Constipation                                                        | 0                         | 1 (14.3%)        | 0                      | 0                | 0                       | 0                | 0                       | 0                 | 0                       | 0                | 0                   | 0                 |
| Nausea                                                              | 1 (14.3%)                 | 2 (28.6%)        | 0                      | 0                | 1 (14.3%)               | 3 (42.9%)        | 0                       | 0                 | 0                       | 1 (14.3%)        | 2 (22.2%)           | 2 (22.2%)         |
| Vomiting                                                            | 1 (14.3%)                 | 1 (14.3%)        | 0                      | 0                | 0                       | 2 (28.6%)        | 0                       | 0                 | 1 (14.3%)               | 1 (14.3%)        | 1 (11.1%)           | 1 (11.1%)         |
| Paraesthesia oral                                                   | 0                         | 0                | 0                      | 0                | 0                       | 0                | 0                       | 0                 | 0                       | 0                | 0                   | 1 (11.1%)         |
| <b>General disorders and administration site conditions</b>         | <b>0</b>                  | <b>2 (28.6%)</b> | <b>0</b>               | <b>0</b>         | <b>1 (14.3%)</b>        | <b>2 (28.6%)</b> | <b>1 (14.3%)</b>        | <b>3 (42.9%)</b>  | <b>0</b>                | <b>1 (14.3%)</b> | <b>1 (11.1%)</b>    | <b>0</b>          |
| Application site erythema                                           | 0                         | 0                | 0                      | 0                | 1 (14.3%)               | 0                | 0                       | 0                 | 0                       | 0                | 0                   | 0                 |
| Fatigue                                                             | 0                         | 0                | 0                      | 0                | 0                       | 0                | 0                       | 1 (14.3%)         | 0                       | 0                | 1 (11.1%)           | 0                 |
| Application site inflammation                                       | 0                         | 0                | 0                      | 0                | 0                       | 0                | 0                       | 0                 | 0                       | 1 (14.3%)        | 0                   | 0                 |
| Vessel puncture site haematoma                                      | 0                         | 0                | 0                      | 0                | 0                       | 1 (14.3%)        | 0                       | 0                 | 0                       | 0                | 0                   | 0                 |
| Vessel puncture site pain                                           | 0                         | 0                | 0                      | 0                | 0                       | 0                | 1 (14.3%)               | 0                 | 0                       | 0                | 0                   | 0                 |
| Medical device site erythema                                        | 0                         | 1 (14.3%)        | 0                      | 0                | 0                       | 1 (14.3%)        | 1 (14.3%)               | 2 (28.6%)         | 0                       | 0                | 0                   | 0                 |
| Medical device site haematoma                                       | 0                         | 0                | 0                      | 0                | 0                       | 0                | 0                       | 1 (14.3%)         | 0                       | 0                | 0                   | 0                 |
| Medical device site pruritus                                        | 0                         | 1 (14.3%)        | 0                      | 0                | 0                       | 0                | 0                       | 1 (14.3%)         | 0                       | 0                | 0                   | 0                 |
| <b>Immune system disorders</b>                                      | <b>0</b>                  | <b>1 (14.3%)</b> | <b>0</b>               | <b>0</b>         | <b>0</b>                | <b>0</b>         | <b>0</b>                | <b>0</b>          | <b>0</b>                | <b>0</b>         | <b>0</b>            | <b>0</b>          |
| Allergy to arthropod sting                                          | 0                         | 1 (14.3%)        | 0                      | 0                | 0                       | 0                | 0                       | 0                 | 0                       | 0                | 0                   | 0                 |
| <b>Infections and infestations</b>                                  | <b>1 (14.3%)</b>          | <b>0</b>         | <b>0</b>               | <b>1 (20.0%)</b> | <b>0</b>                | <b>0</b>         | <b>0</b>                | <b>1 (14.3%)</b>  | <b>0</b>                | <b>2 (28.6%)</b> | <b>2 (22.2%)</b>    | <b>3 (33.3%)</b>  |
| Nasopharyngitis                                                     | 1 (14.3%)                 | 0                | 0                      | 1 (20.0%)        | 0                       | 0                | 0                       | 1 (14.3%)         | 0                       | 0                | 1 (11.1%)           | 3 (33.3%)         |
| Tonsillitis                                                         | 0                         | 0                | 0                      | 0                | 0                       | 0                | 0                       | 0                 | 0                       | 0                | 1 (11.1%)           | 0                 |
| Urinary tract infection                                             | 0                         | 0                | 0                      | 0                | 0                       | 0                | 0                       | 0                 | 0                       | 1 (14.3%)        | 0                   | 0                 |
| Oral herpes                                                         | 0                         | 0                | 0                      | 0                | 0                       | 0                | 0                       | 0                 | 0                       | 1 (14.3%)        | 0                   | 0                 |
| <b>Injury, poisoning and procedural complications</b>               | <b>0</b>                  | <b>0</b>         | <b>0</b>               | <b>0</b>         | <b>0</b>                | <b>0</b>         | <b>1 (14.3%)</b>        | <b>0</b>          | <b>0</b>                | <b>1 (14.3%)</b> | <b>0</b>            | <b>0</b>          |
| Arthropod sting                                                     | 0                         | 0                | 0                      | 0                | 0                       | 0                | 0                       | 0                 | 0                       | 1 (14.3%)        | 0                   | 0                 |

| Primary System Organ Class<br>Preferred Term<br>MedDRA version 18.1 | Postmenopausal women      |                  |                        |                  |                         |                  |                         |                   |                         |                  | Premenopausal women |                   |
|---------------------------------------------------------------------|---------------------------|------------------|------------------------|------------------|-------------------------|------------------|-------------------------|-------------------|-------------------------|------------------|---------------------|-------------------|
|                                                                     | Placebo<br>Single<br>dose | Placebo<br>14 d  | 3 mg<br>Single<br>dose | 3 mg<br>14 d     | 30 mg<br>Single<br>dose | 30 mg<br>14 d    | 60 mg<br>Single<br>dose | 60 mg BID<br>14 d | 90 mg<br>Single<br>dose | 90 mg<br>14 d    | 60 mg<br>28 d       | 60 mg BID<br>28 d |
|                                                                     | N=7<br>(100%)             | N=7<br>(100%)    | N=5<br>(100%)          | N=5<br>(100%)    | N=7<br>(100%)           | N=7<br>(100%)    | N=7<br>(100%)           | N=7<br>(100%)     | N=7<br>(100%)           | N=7<br>(100%)    | N=9<br>(100%)       | N=9<br>(100%)     |
| Fall                                                                | 0                         | 0                | 0                      | 0                | 0                       | 0                | 1 (14.3%)               | 0                 | 0                       | 0                | 0                   | 0                 |
| Subcutaneous haematoma                                              | 0                         | 0                | 0                      | 0                | 0                       | 0                | 1 (14.3%)               | 0                 | 0                       | 0                | 0                   | 0                 |
| <b>Investigations</b>                                               | <b>0</b>                  | <b>3 (42.9%)</b> | <b>1 (20.0%)</b>       | <b>0</b>         | <b>1 (14.3%)</b>        | <b>2 (28.6%)</b> | <b>0</b>                | <b>5 (71.4%)</b>  | <b>2 (28.6%)</b>        | <b>4 (57.1%)</b> | <b>1 (11.1%)</b>    | <b>0</b>          |
| Aspartate aminotransferase increased                                | 0                         | 0                | 0                      | 0                | 0                       | 1 (14.3%)        | 0                       | 0                 | 0                       | 0                | 0                   | 0                 |
| Blood bilirubin increased                                           | 0                         | 0                | 1 (20.0%)              | 0                | 0                       | 0                | 0                       | 5 (71.4%)         | 1 (14.3%)               | 1 (14.3%)        | 1 (11.1%)           | 0                 |
| Blood cholesterol increased                                         | 0                         | 1 (14.3%)        | 0                      | 0                | 1 (14.3%)               | 0                | 0                       | 0                 | 0                       | 0                | 0                   | 0                 |
| Blood fibrinogen decreased                                          | 0                         | 1 (14.3%)        | 0                      | 0                | 0                       | 0                | 0                       | 0                 | 0                       | 0                | 0                   | 0                 |
| Blood fibrinogen increased                                          | 0                         | 0                | 0                      | 0                | 0                       | 0                | 0                       | 0                 | 1 (14.3%)               | 2 (28.6%)        | 0                   | 0                 |
| Eosinophil count increased                                          | 0                         | 0                | 0                      | 0                | 0                       | 0                | 0                       | 1 (14.3%)         | 0                       | 0                | 0                   | 0                 |
| Blood urine present                                                 | 0                         | 0                | 0                      | 0                | 1 (14.3%)               | 1 (14.3%)        | 0                       | 0                 | 0                       | 1 (14.3%)        | 0                   | 0                 |
| Low density lipoprotein increased                                   | 0                         | 2 (28.6%)        | 0                      | 0                | 0                       | 0                | 0                       | 0                 | 0                       | 0                | 0                   | 0                 |
| Neutrophil count decreased                                          | 0                         | 0                | 0                      | 0                | 0                       | 0                | 0                       | 0                 | 0                       | 1 (14.3%)        | 0                   | 0                 |
| Protein total decreased                                             | 0                         | 0                | 0                      | 0                | 0                       | 0                | 0                       | 0                 | 0                       | 1 (14.3%)        | 0                   | 0                 |
| Red blood cells urine positive                                      | 0                         | 0                | 0                      | 0                | 0                       | 1 (14.3%)        | 0                       | 0                 | 0                       | 1 (14.3%)        | 0                   | 0                 |
| Nitrite urine present                                               | 0                         | 0                | 0                      | 0                | 0                       | 0                | 0                       | 0                 | 1 (14.3%)               | 1 (14.3%)        | 0                   | 0                 |
| <b>Metabolism and nutrition disorders</b>                           | <b>0</b>                  | <b>0</b>         | <b>0</b>               | <b>0</b>         | <b>0</b>                | <b>1 (14.3%)</b> | <b>0</b>                | <b>0</b>          | <b>0</b>                | <b>3 (42.9%)</b> | <b>0</b>            | <b>1 (11.1%)</b>  |
| Decreased appetite                                                  | 0                         | 0                | 0                      | 0                | 0                       | 1 (14.3%)        | 0                       | 0                 | 0                       | 3 (42.9%)        | 0                   | 1 (11.1%)         |
| <b>Musculoskeletal and connective tissue disorders</b>              | <b>1 (14.3%)</b>          | <b>1 (14.3%)</b> | <b>2 (40.0%)</b>       | <b>0</b>         | <b>0</b>                | <b>1 (14.3%)</b> | <b>1 (14.3%)</b>        | <b>0</b>          | <b>0</b>                | <b>0</b>         | <b>0</b>            | <b>0</b>          |
| Back pain                                                           | 1 (14.3%)                 | 1 (14.3%)        | 0                      | 0                | 0                       | 0                | 0                       | 0                 | 0                       | 0                | 0                   | 0                 |
| Myalgia                                                             | 0                         | 0                | 1 (20.0%)              | 0                | 0                       | 0                | 0                       | 0                 | 0                       | 0                | 0                   | 0                 |
| Pain in extremity                                                   | 0                         | 0                | 1 (20.0%)              | 0                | 0                       | 0                | 0                       | 0                 | 0                       | 0                | 0                   | 0                 |
| Muscle tightness                                                    | 0                         | 0                | 0                      | 0                | 0                       | 0                | 1 (14.3%)               | 0                 | 0                       | 0                | 0                   | 0                 |
| Spinal pain                                                         | 0                         | 0                | 0                      | 0                | 0                       | 1 (14.3%)        | 0                       | 0                 | 0                       | 0                | 0                   | 0                 |
| <b>Nervous system disorders</b>                                     | <b>0</b>                  | <b>1 (14.3%)</b> | <b>1 (20.0%)</b>       | <b>3 (60.0%)</b> | <b>1 (14.3%)</b>        | <b>2 (28.6%)</b> | <b>0</b>                | <b>1 (14.3%)</b>  | <b>0</b>                | <b>1 (14.3%)</b> | <b>3 (33.3%)</b>    | <b>4 (44.4%)</b>  |
| Dizziness                                                           | 0                         | 1 (14.3%)        | 0                      | 0                | 0                       | 0                | 0                       | 0                 | 0                       | 0                | 0                   | 0                 |
| Headache                                                            | 0                         | 0                | 0                      | 3 (60.0%)        | 1 (14.3%)               | 1 (14.3%)        | 0                       | 1 (14.3%)         | 0                       | 1 (14.3%)        | 3 (33.3%)           | 4 (44.4%)         |
| Paraesthesia                                                        | 0                         | 0                | 1 (20.0%)              | 1 (20.0%)        | 0                       | 0                | 0                       | 0                 | 0                       | 0                | 0                   | 0                 |
| Somnolence                                                          | 0                         | 0                | 0                      | 0                | 0                       | 1 (14.3%)        | 0                       | 0                 | 0                       | 0                | 0                   | 0                 |
| <b>Renal and urinary disorders</b>                                  | <b>0</b>                  | <b>0</b>         | <b>0</b>               | <b>0</b>         | <b>0</b>                | <b>1 (14.3%)</b> | <b>0</b>                | <b>0</b>          | <b>0</b>                | <b>2 (28.6%)</b> | <b>0</b>            | <b>0</b>          |
| Renal pain                                                          | 0                         | 0                | 0                      | 0                | 0                       | 1 (14.3%)        | 0                       | 0                 | 0                       | 2 (28.6%)        | 0                   | 0                 |

| Primary System Organ Class<br>Preferred Term<br>MedDRA version 18.1 | Postmenopausal women                       |                                  |                                         |                               |                                          |                                |                                          |                                    | Premenopausal women                      |                                |                                |                                    |
|---------------------------------------------------------------------|--------------------------------------------|----------------------------------|-----------------------------------------|-------------------------------|------------------------------------------|--------------------------------|------------------------------------------|------------------------------------|------------------------------------------|--------------------------------|--------------------------------|------------------------------------|
|                                                                     | Placebo<br>Single<br>dose<br>N=7<br>(100%) | Placebo<br>14 d<br>N=7<br>(100%) | 3 mg<br>Single<br>dose<br>N=5<br>(100%) | 3 mg<br>14 d<br>N=5<br>(100%) | 30 mg<br>Single<br>dose<br>N=7<br>(100%) | 30 mg<br>14 d<br>N=7<br>(100%) | 60 mg<br>Single<br>dose<br>N=7<br>(100%) | 60 mg BID<br>14 d<br>N=7<br>(100%) | 90 mg<br>Single<br>dose<br>N=7<br>(100%) | 90 mg<br>14 d<br>N=7<br>(100%) | 60 mg<br>28 d<br>N=9<br>(100%) | 60 mg BID<br>28 d<br>N=9<br>(100%) |
| Respiratory, thoracic and<br>mediastinal disorders                  | 1 (14.3%)                                  | 0                                | 0                                       | 0                             | 0                                        | 0                              | 0                                        | 0                                  | 0                                        | 0                              | 0                              | 0                                  |
| Cough                                                               | 1 (14.3%)                                  | 0                                | 0                                       | 0                             | 0                                        | 0                              | 0                                        | 0                                  | 0                                        | 0                              | 0                              | 0                                  |

BID, twice daily. The drug was given once (daily), unless indicated otherwise.

Numbers indicate the number of participants affected. Percentages refer to the total number of participants who received the respective treatment.

**Suppl. Table 6: Androsterone, etiocholanolone, and DHT in serum: Minimum and maximum concentrations observed and reference ranges for healthy premenopausal women**

|                                  | <b>N</b> | <b>Androsterone</b><br>[nM] <sup>a</sup> | <b>Etiocholanolone</b><br>[nM] <sup>a</sup> | <b>Dihydrotestosterone (DHT)</b><br>[nM] <sup>a</sup> |
|----------------------------------|----------|------------------------------------------|---------------------------------------------|-------------------------------------------------------|
| Pre-treatment cycle <sup>a</sup> | 18       | 0.138 – 1.824                            | <0.069 <sup>b</sup> – 1.119                 | 0.193 – 0.928                                         |
| Treatment period <sup>a</sup>    | 18       | 0.225 – 6.360                            | <0.069 <sup>b</sup> – 1.750                 | 0.240 – 1.190                                         |
| Shiraishi et al. (1)             | 133      | n.a.                                     | n.a.                                        | 0.09 – 0.91                                           |
| Rothman et al. (2)               | 29       | n.a.                                     | n.a.                                        | (0.316 ± 0.023) <sup>d,e</sup>                        |
| Mezzulo et al. (3)               | 118      | n.a.                                     | n.a.                                        | <0.134 – 0.675                                        |
| Ke et al., 2017 (4)              | 10       | 0.164 – 1.066                            | n.a.                                        | n.a.                                                  |

<sup>a</sup> Note: Multiple measurements were conducted for each subject throughout the menstrual cycle. Values were converted to meet nM by multiplication factor of 0.0344 from ng/dL. The molecular weight is quite similar for all three steroids (androsterone: 290.447 g/mol; etiocholanolone: 290.445 g/mol; DHT: 290.442 g/mol); <sup>b</sup> ranges were calculated based on all available data, i.e., 8 to 11 data points per participant in the pre-treatment period and 7 to 12 data points per participant in the treatment period; <sup>c</sup> limit of detection; <sup>d</sup> samples were taken during the early follicular phase; <sup>e</sup> mean ± standard deviation. n.a., not applicable.



## 2.2 Supplemental figures

Suppl. Figure 1: Subject disposition

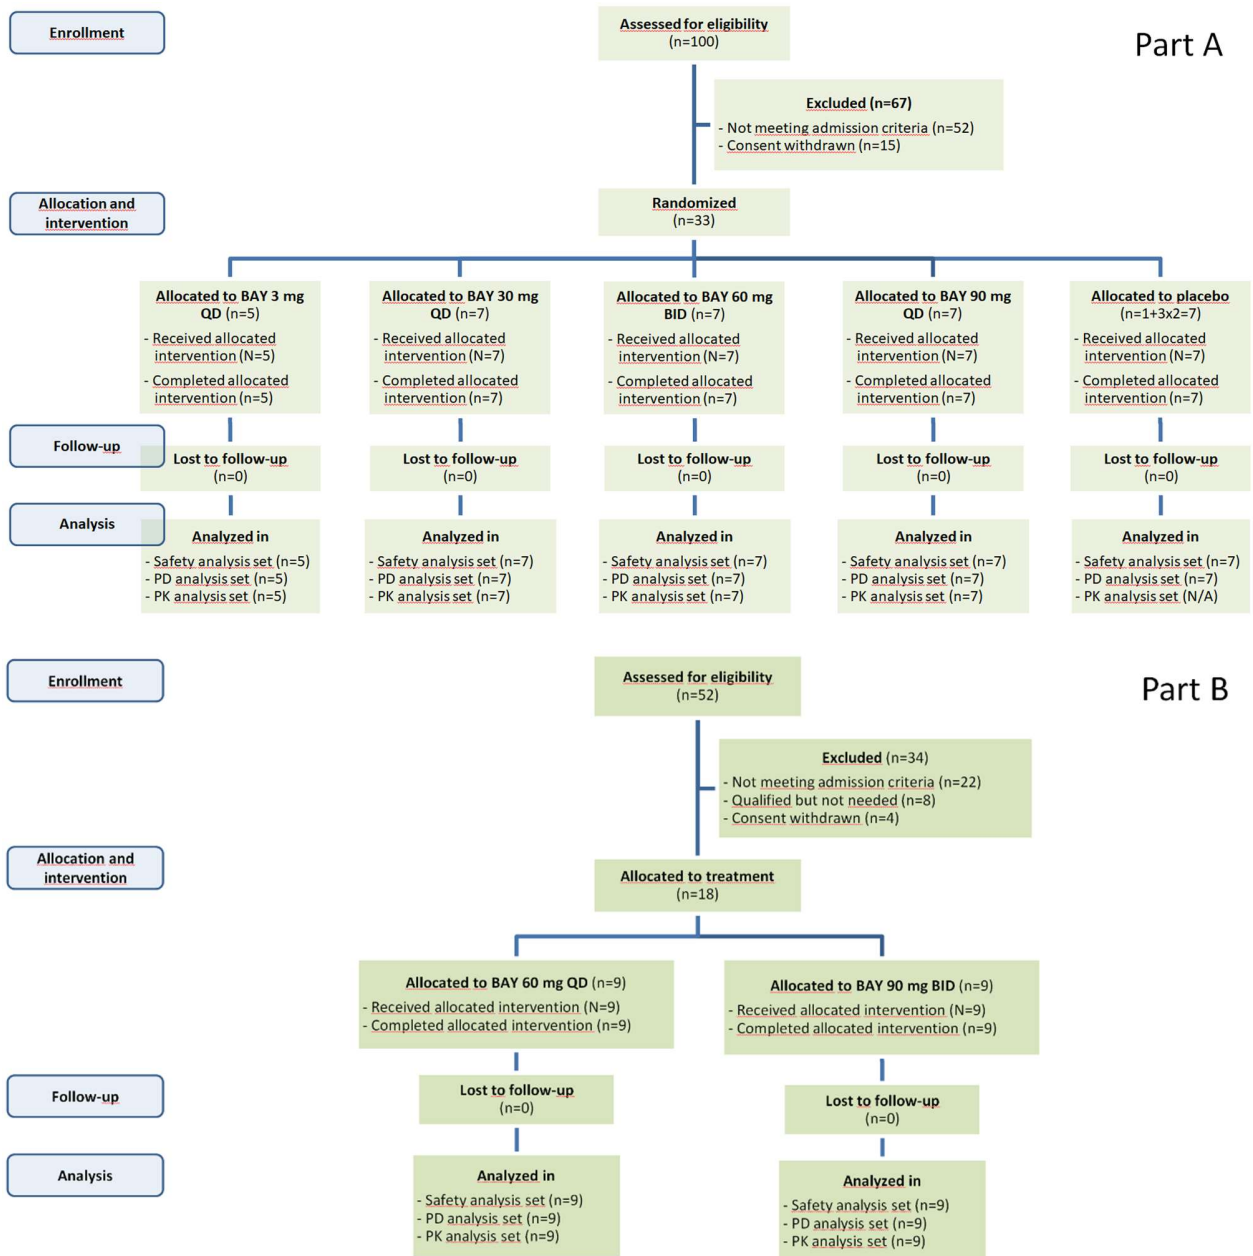

Suppl. Figure 2: Individual estradiol and progesterone serum concentrations before and during treatment with BAY1128688 60 mg QD and BID (premenopausal women)

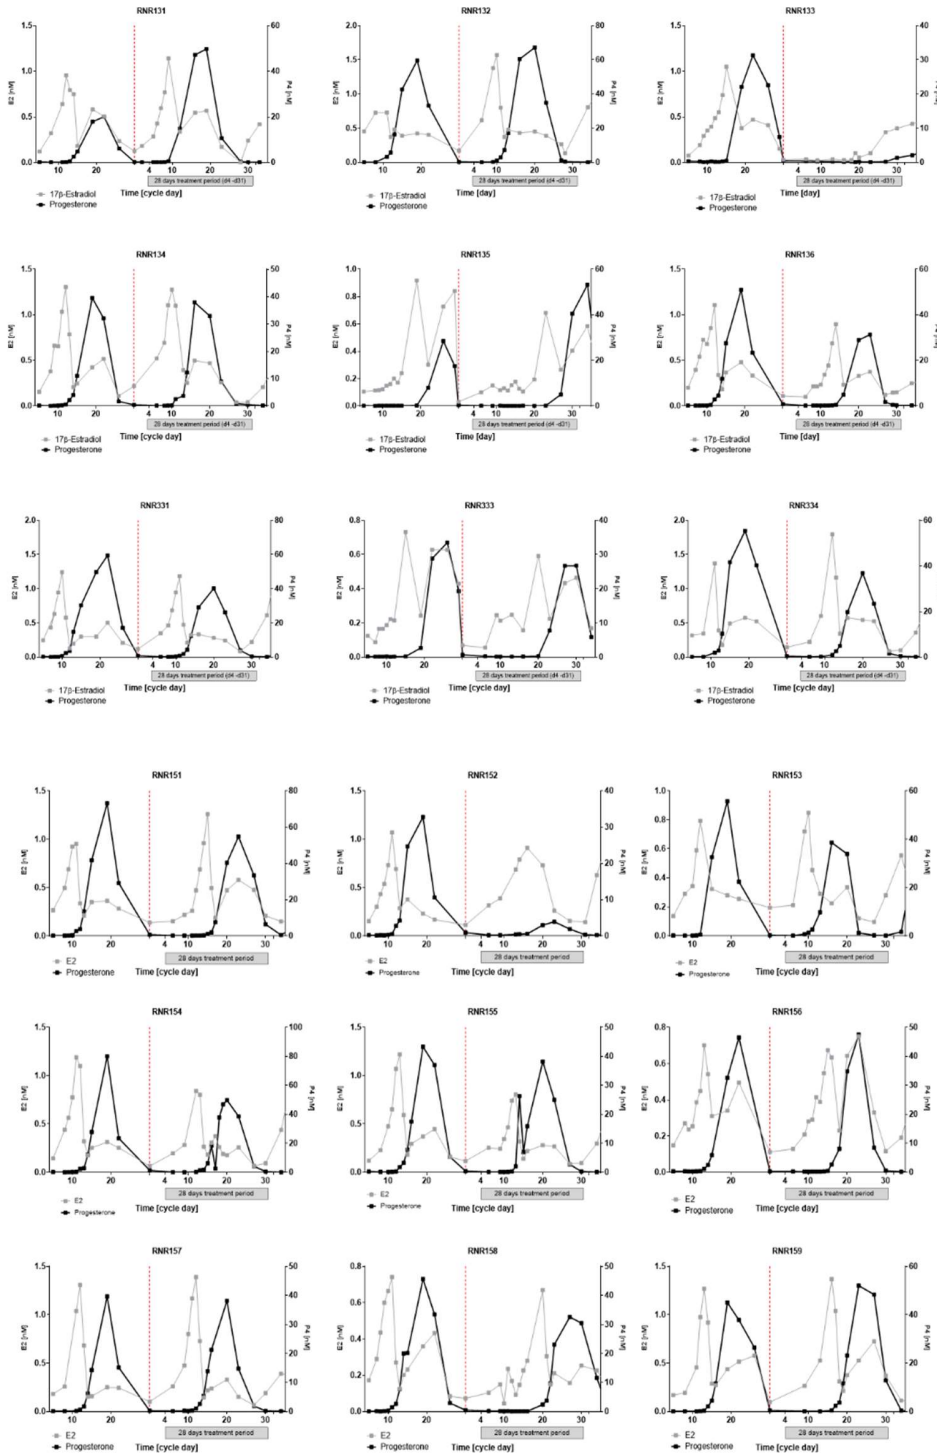

Pronounced/sharp/distinct# estradiol and progesterone peaks can be considered as indicative of intact ovulatory cycles.

**Suppl. Figure 3: Ovarian activity (Hoogland scores) before and during treatment with BAY1128688 60 mg QD and BID (premenopausal women)**

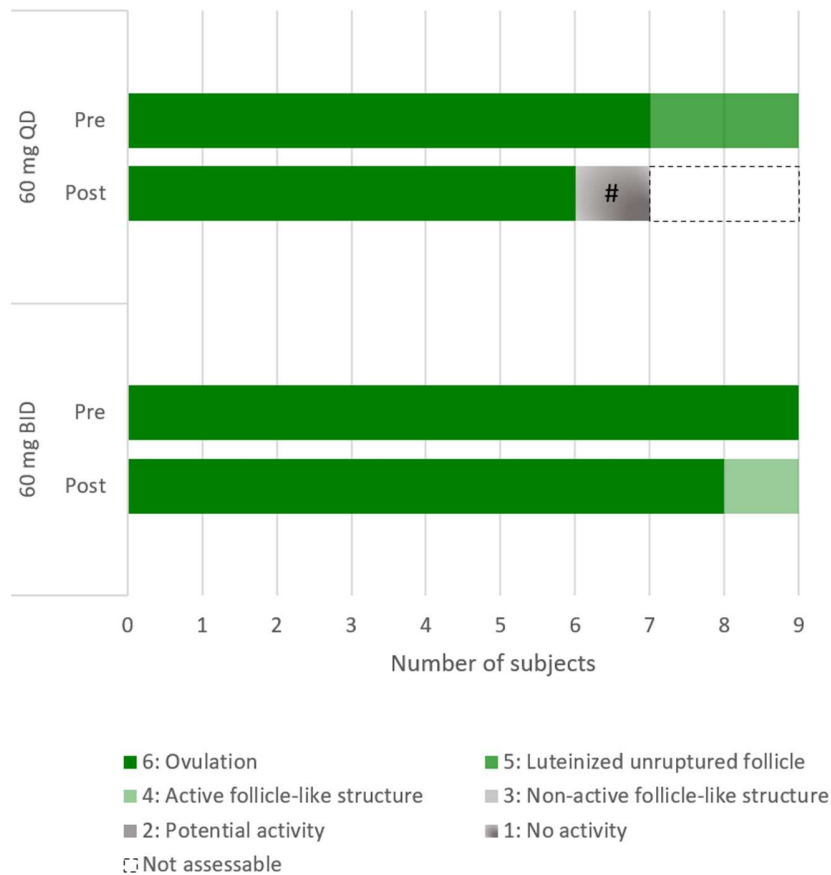

The Hoogland score is a combination score based on (1) the diameter of the largest follicle-like structure (FLS) in either ovary, (2) the concentration of estradiol (E2) in serum, and (3) the concentration of progesterone (P) in serum (Hoogland HJ & Skouby SO. Contraception 1993; 47(6):583–90).

**Scoring criteria**

| Score |                                    | FLS diameter [mm] | E2 [nmol/L] | P [nmol/L] |
|-------|------------------------------------|-------------------|-------------|------------|
| 1     | No activity                        | ≤ 10              | --          | --         |
| 2     | Potential activity                 | > 10              | --          | --         |
| 3     | Non-active follicle-like structure | > 13              | ≤ 0.1       | --         |
| 4     | Active follicle-like structure     | > 13              | > 0.1       | ≤ 5        |
| 5     | Luteinized unruptured follicle     | > 13, persisting  | > 0.1       | > 5        |
| 6     | Ovulation                          | > 13, ruptured    | > 0.1       | > 5        |

#, Elevated serum follicle-stimulating hormone values during treatment (maximum (cycle day 17): 36.0 U/L, ULN 19 U/L), which decreased again after treatment, intra-cyclic bleeding were interpreted as signs of a perimenopausal state of the participant.

### 2.3 Population pharmacokinetic modeling

The developed popPK model consisted structurally of a depot, central and peripheral compartments for both tablet formulation and solution as well as four additional transit compartments for the tablet formulation. Absorption was modeled by a first order process for both formulations, including a lag time in absorption for the tablet formulation. The elimination of the drug from the central compartment followed Michaelis-Menten kinetics. Random effect parameters accounting for inter-individual variability (IIV) were associated to the maximum elimination rate from the central compartment ( $V_{max}$ ), the apparent volume of the central compartment ( $V_c/F$ ), and the absorption rate constants ( $k_1$  for the solution and  $k_2$  for the tablet formulation, same IIV). To account for any unexplained variability, two residual error terms were included for the solution and tablet formulation separately. For the parameter  $V_c/F$  body weight (increased  $V_c/F$ ) and the administered BAY1128688 dose (for  $\leq 10$  mg:  $V_c/F$  decreased with dose) were identified as covariates. Furthermore, the parameter  $V_{max}$  increased with the administered BAY1128688 dose up to 10 mg. To account for food effects, a two-population mixture model was introduced for the absorption rate constant of the tablet formulation under fed conditions. Moreover, a fixed bioavailability parameter was used when estimating plasma concentrations of BAY1128688 under fed condition.

A visual predictive check (1000 simulations of the study described in this paper) confirmed that the selected popPK model was able to adequately account for the observed plasma exposure of BAY1128688 in both study parts. Hence, it was concluded that both premenopausal and postmenopausal women exhibited the same plasma exposure of BAY1128688.

The developed popPK model for BAY1128688 set the base for further popPK/PD modelling, e.g., describing the BAY1128688 concentration dependent effect on serum bilirubin over time (see main manuscript text, section 3.4).

## 2.4 Evaluation of renal safety

No early signs of kidney damage were detected as the mean values of kidney safety markers KIM-1, neutrophil gelatinase-associated lipocalin, albumin, cystatin C, and creatinine were not changed in a relevant way at the end of the multiple-dose treatment compared to pre-treatment values and values during placebo treatment (data on file; Bayer AG).

## 3 References

1. Shiraiishi S, Lee PWN, Leung A, Goh VHH, Swerdloff RS, Wang C. Simultaneous measurement of serum testosterone and dihydrotestosterone by liquid chromatography-tandem mass spectrometry. *Clin Chem* 2008; 54(11):1855–63.
2. Rothman MS, Carlson NE, Xu M, Wang C, Swerdloff R, Lee P et al. Reexamination of testosterone, dihydrotestosterone, estradiol and estrone levels across the menstrual cycle and in postmenopausal women measured by liquid chromatography-tandem mass spectrometry. *Steroids* 2011; 76(1-2):177–82. Available from: URL: <https://www.ncbi.nlm.nih.gov/pmc/articles/PMC3005029/pdf/nihms251893.pdf>.
3. Mezzullo M, Pelusi C, Fazzini A, Repaci A, Di Dalmazi G, Gambineri A et al. Female and male serum reference intervals for challenging sex and precursor steroids by liquid chromatography - tandem mass spectrometry. *J Steroid Biochem Mol Biol* 2020; 197:105538.
4. Ke Y, Gonthier R, Labrie F. A sensitive and accurate LC-MS/MS assay with the derivatization of 1-Amino-4-methylpiperazine applied to serum allopregnanolone, pregnenolone and androsterone in pre- and postmenopausal women. *Steroids* 2017; 118:25–31.
5. Yee DJ, Balsanek V, Bauman DR, Penning TM, Sames D. Fluorogenic metabolic probes for direct activity readout of redox enzymes: Selective measurement of human AKR1C2 in living cells. *Proc Natl Acad Sci U S A* 2006; 103(36):13304–9. Available from: URL: <https://pubmed.ncbi.nlm.nih.gov/16938874/>.
6. Halim M, Yee DJ, Sames D. Imaging induction of cytoprotective enzymes in intact human cells: coumberone, a metabolic reporter for human AKR1C enzymes reveals activation by panaxytriol, an active component of red ginseng. *Journal of the American Chemical Society* 2008; 130(43):14123–8. Available from: URL: <https://pubmed.ncbi.nlm.nih.gov/18826220/>.
